# Supplementary material
Source: HighWire-hosted journal article supplement (https://adc.bmj.com/content/108/7/e11)
Supplement: inline-supplementary-material-1 [file inline-supplementary-material-1.pdf]

## Supplementary material

### Figure

Evolution of the RCH HITH COVID-19 guideline (new changes highlighted in red text for each iteration)

#### A) Original guideline March 2020

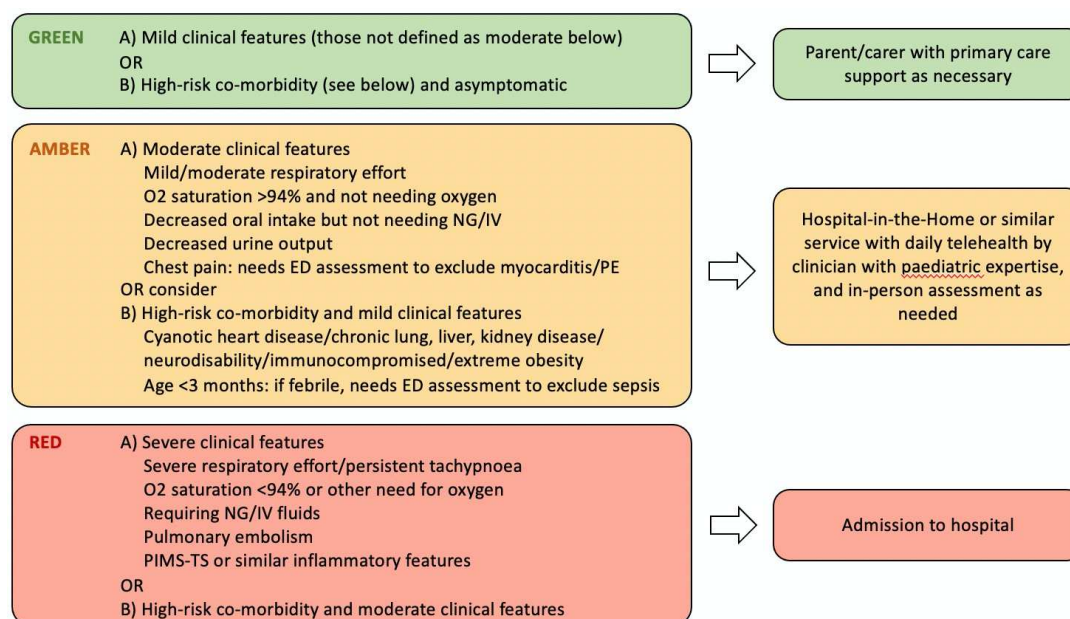

#### B) Guideline changes in response to delta wave October 2021

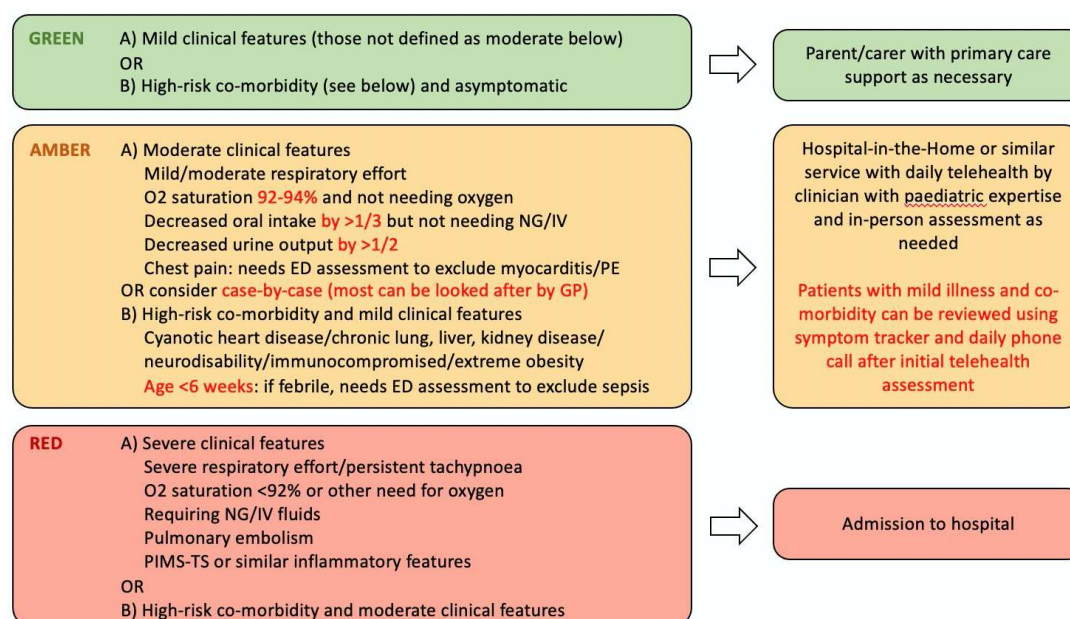

## C) Guideline changes in response to omicron wave March 2022

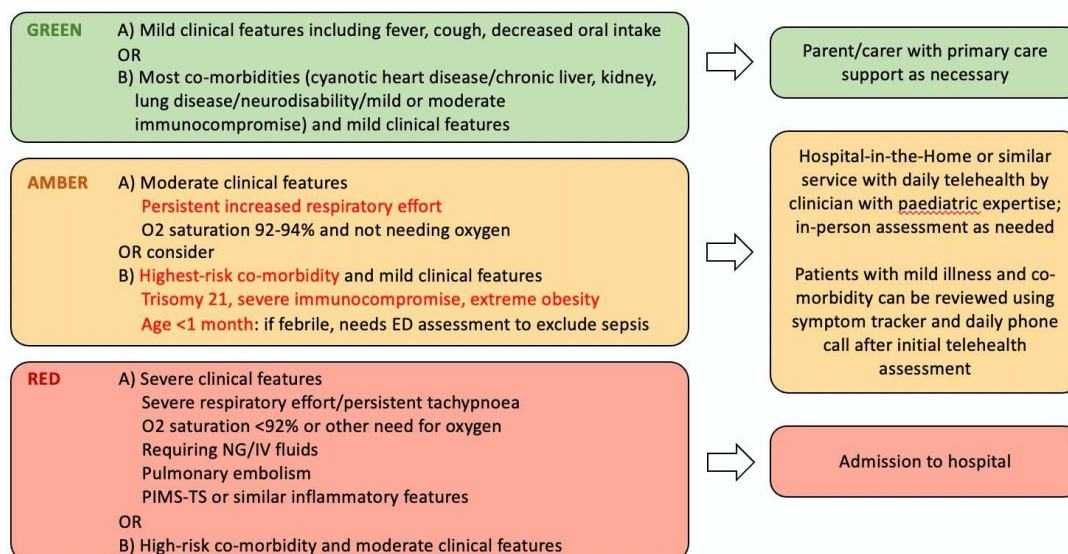

## Tables

Table A. Telehealth use on HITH pre- and during COVID

|                        | Pre-COVID             |                        | During COVID          |                        | OR,<br>95% CI | P<br>value |
|------------------------|-----------------------|------------------------|-----------------------|------------------------|---------------|------------|
|                        | In person<br>No. (%)* | Telehealth<br>No. (%)* | In person<br>No. (%)* | Telehealth<br>No. (%)* |               |            |
| <b>Nursing</b>         |                       |                        |                       |                        |               |            |
| Registered nurse       | 25,425 (98)           | 471 (2)                | 27,107 (95)           | 1,286 (5)              | 2.6, 2.3-2.9  | <0.001     |
| <b>Medical</b>         |                       |                        |                       |                        |               |            |
| Fellow/registrar       | 237 (85)              | 41 (15)                | 118 (14)              | 725 (86)               | 35, 24-52     | <0.001     |
| <b>Allied health</b>   |                       |                        |                       |                        |               |            |
| Physiotherapist        | 3,613 (76)            | 1,115 (24)             | 2,927 (65)            | 1,608 (35)             | 1.8, 1.6-1.9  | <0.001     |
| Dietitian              | 611 (81)              | 141 (19)               | 309 (50)              | 313 (50)               | 4.4, 3.4-5.6  | <0.001     |
| Speech therapist       | 412 (93)              | 32 (7)                 | 294 (55)              | 239 (45)               | 10, 7-16      | <0.001     |
| Occupational therapist | 76 (100)              | 0 (0)                  | 66 (86)               | 11 (14)                | N/A           | <0.001     |
| <b>Total</b>           | 32,174 (94)           | 1,800 (6)              | 35,126 (88)           | 4,182 (12)             | 2.3, 2.2-2.4  | <0.001     |

\*Percentage of visits provided by that practitioner group

Clinical co-ordination of externally outsourced patients not included

Table B. Telehealth use on HITH during the COVID-19 variants: original and alpha, delta and omicron

|                        | Original & alpha<br>Telehealth/total visits<br>(%) | Delta variant<br>Telehealth/total visits<br>(%) | Omicron variant<br>Telehealth/total visits<br>(%) |
|------------------------|----------------------------------------------------|-------------------------------------------------|---------------------------------------------------|
| <b>Nursing</b>         |                                                    |                                                 |                                                   |
| Registered nurse       | 363/16,600 (2)                                     | 416/8,028 (5)                                   | 507/3,886 (13)                                    |
| <b>Medical</b>         |                                                    |                                                 |                                                   |
| Fellow/registrar       | 44/100 (44)                                        | 417/451 (93)                                    | 259/272 (95)                                      |
| <b>Allied health</b>   |                                                    |                                                 |                                                   |
| Physiotherapist        | 1,030/2,819 (37)                                   | 406/1,181 (34)                                  | 172/535 (32)                                      |
| Dietitian              | 183/439 (42)                                       | 80/119 (67)                                     | 50/64 (78)                                        |
| Speech therapist       | 3/42 (7)                                           | 110/179 (62)                                    | 48/67 (72)                                        |
| Occupational therapist | 0/76 (0)                                           | 8/30 (27)                                       | 0/5 (0)                                           |
| <b>Total</b>           | 1,705/20,298 (8)                                   | 1,439/9,995 (14)                                | 1,038/4,833 (21)                                  |
